# Supplementary material for: Synthesis and surface-enhanced Raman scattering of indium nanotriangles and nanowires
Source: Royal Society of Chemistry journal article supplement (doi:10.1039/c7ra03317f), 2017-01-01
Supplement: c7ra03317f1.pdf [file c7ra03317f1.pdf]

**Supporting Information**

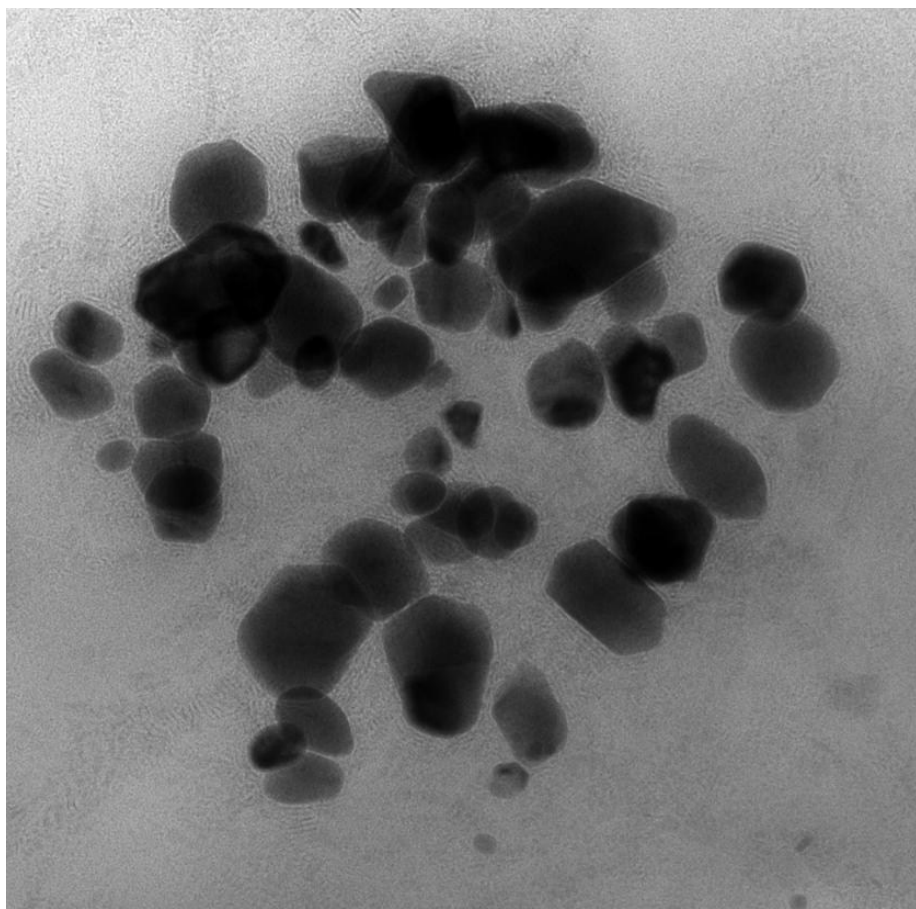

Figure S1: TEM image of In nanoparticles synthesized without controlling the rate of addition of  $\text{NaBH}_4$ .

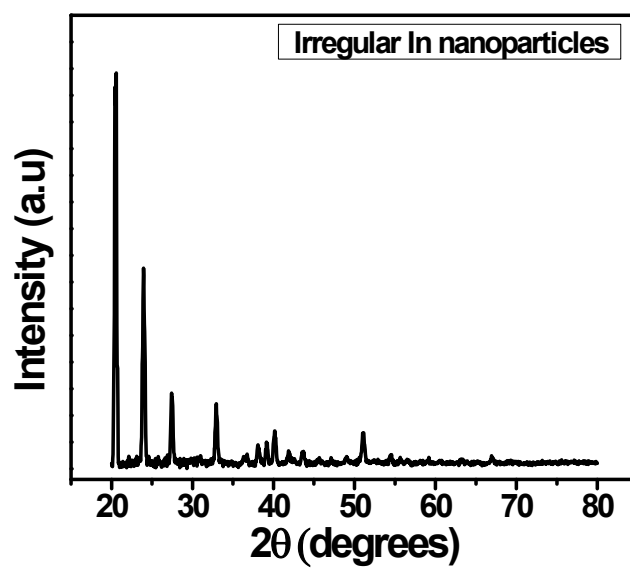

Figure S2: XRD pattern of irregular shaped In nanoparticles.

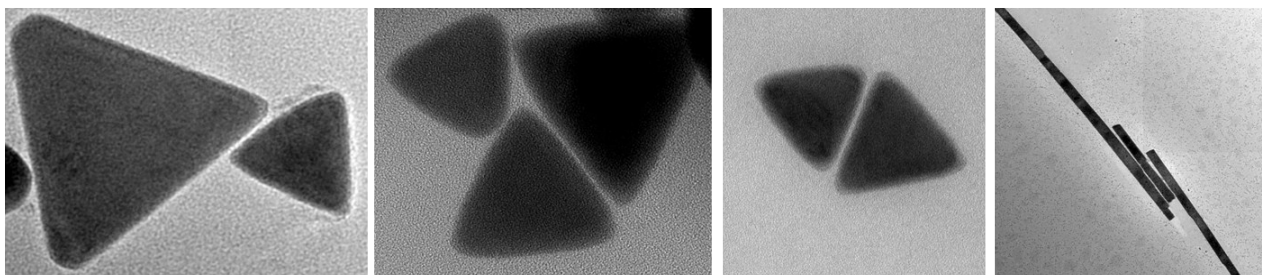

Figure S3: TEM image of different geometric configuration of dimers and higher ensembles of In nanoparticles.
